# Supplementary material for: Analysis of Adhesive Distribution over Particles According to Their Size and Potential Savings from Particle Surface Determination
Source: MDPI journal article supplement (doi:10.3390/fib10110097), 2022-11-11
Supplement: s1 [file s1]

Particle Material 1 (AC 0%)

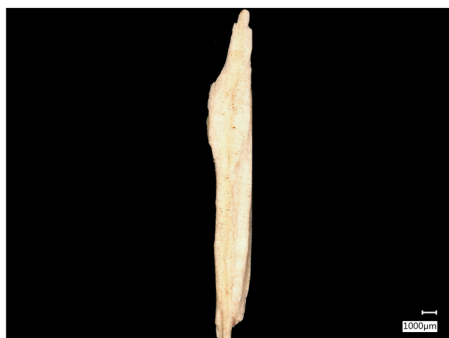

3.15-4\_Particle01.jpg

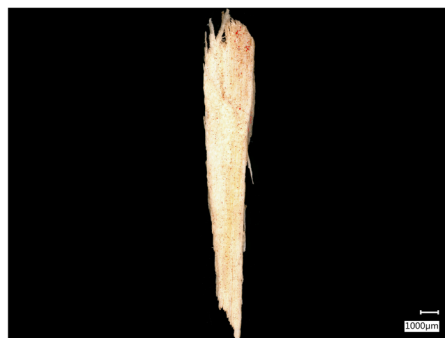

3.15-4\_Particle02.jpg

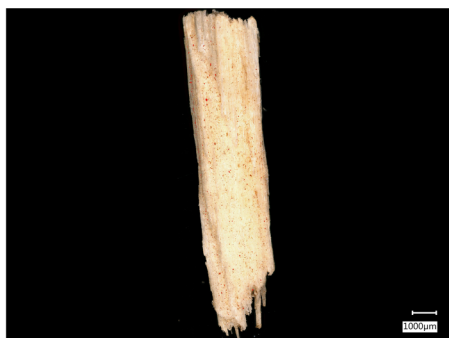

3.15-4\_Particle03.jpg

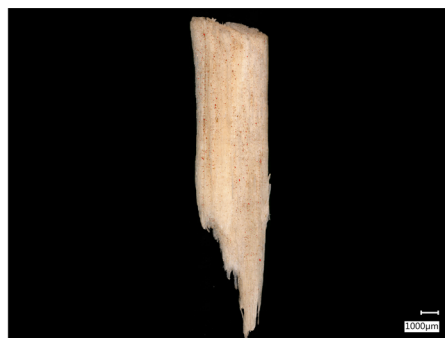

3.15-4\_Particle04.jpg

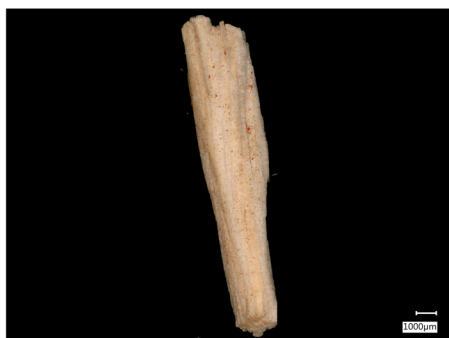

3.15-4\_Particle05.jpg

Particle Material 2 (AC 8%)

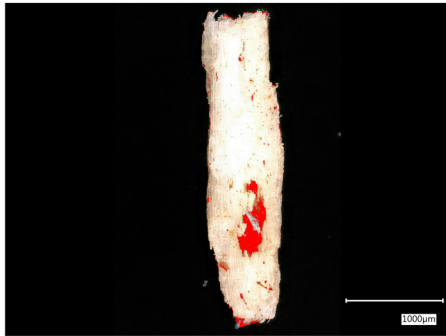

0-0.8\_Particle 1.jpg

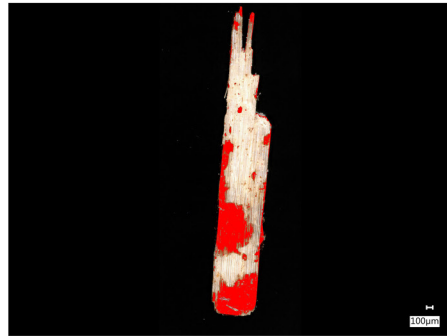

0-0.8\_Particle 2.jpg

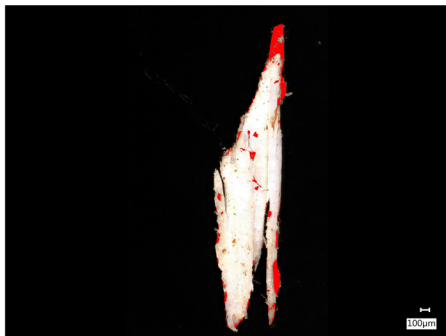

0-0.8\_Particle 3.jpg

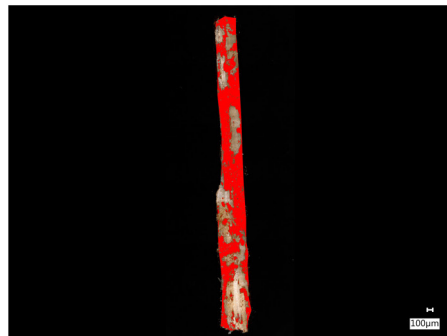

0-0.8\_Particle 4.jpg

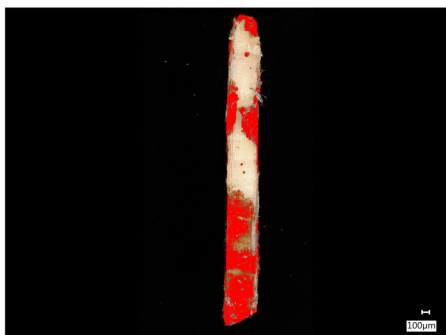

0-0.8\_Particle 10.jpg

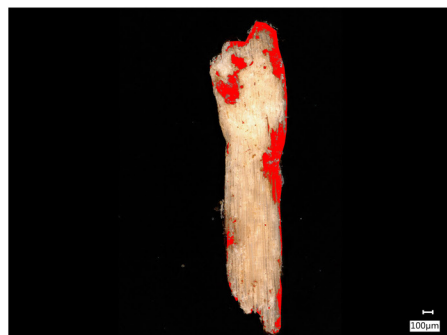

0-0.8\_Particle05.jpg

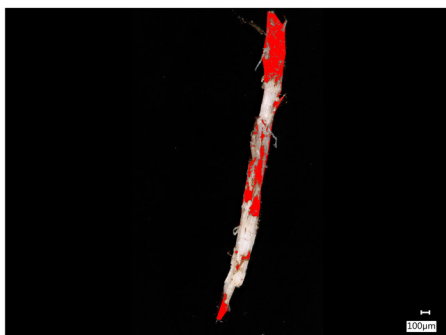

0-0.8\_Particle06.jpg

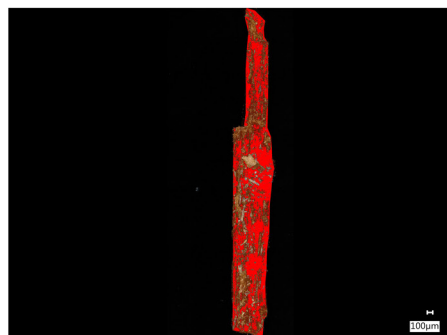

0-0.8\_Particle07.jpg

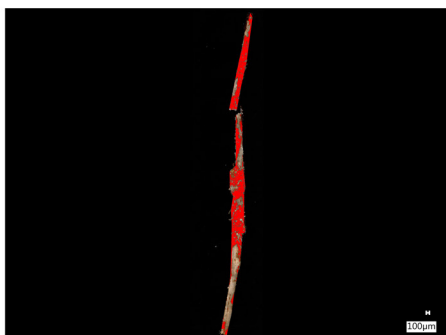

0-0.8\_Particle08.jpg

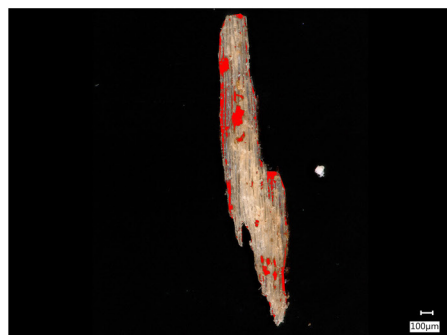

0-0.8\_Particle09.jpg

Particle Material 2 (AC 8%)

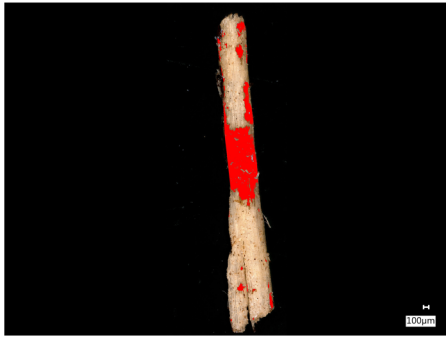

0.8-1\_Particle01.jpg

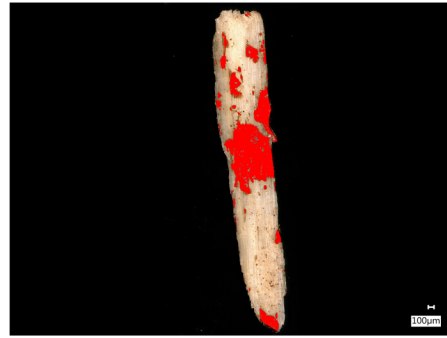

0.8-1\_Particle02.jpg

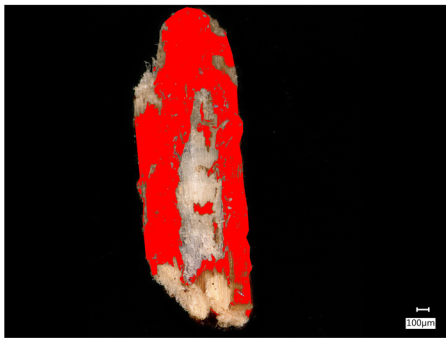

0.8-1\_Particle03.jpg

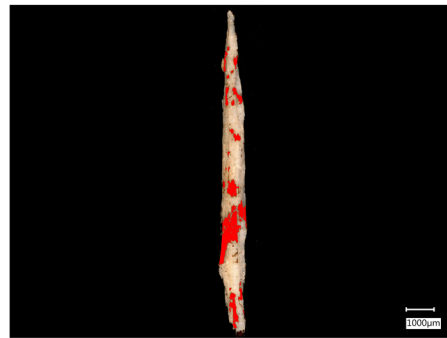

0.8-1\_Particle04.jpg

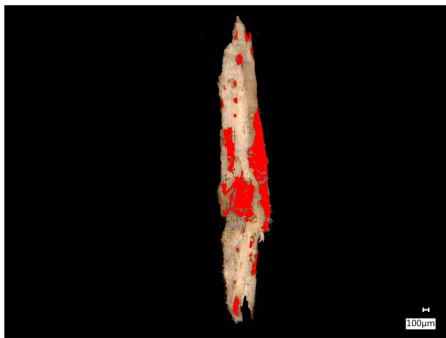

0.8-1\_Particle05.jpg

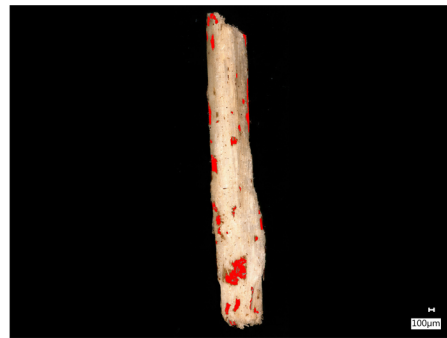

0.8-1\_Particle06.jpg

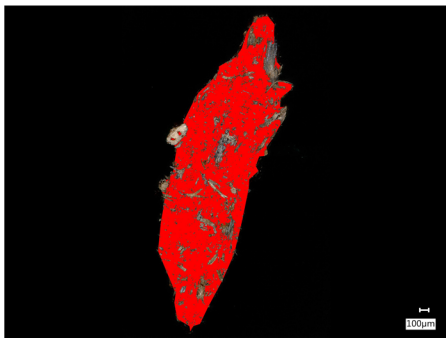

0.8-1\_Particle07.jpg

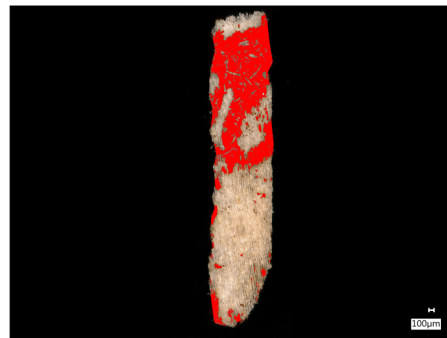

0.8-1\_Particle08.jpg

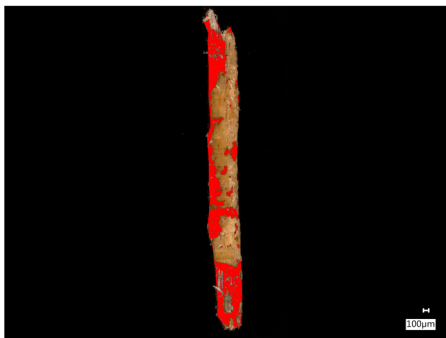

0.8-1\_Particle09.jpg

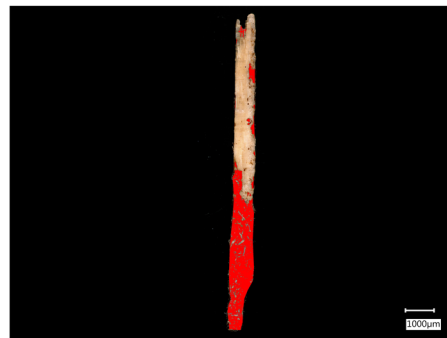

0.8-1\_Particle10.jpg

Particle Material 2 (AC 8%)

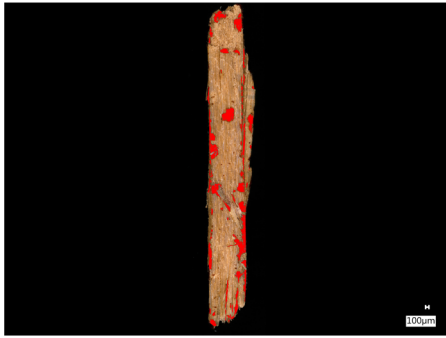

1-1.6\_Particle01.jpg

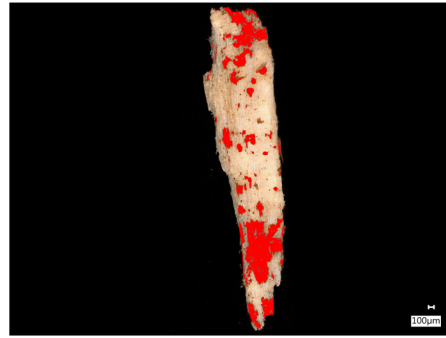

1-1.6\_Particle02.jpg

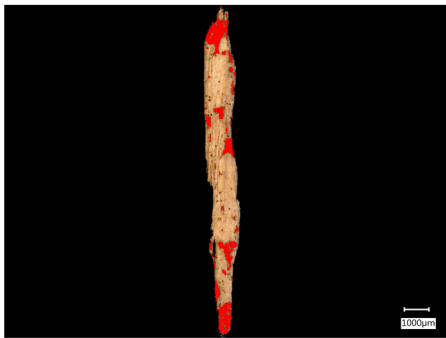

1-1.6\_Particle03.jpg

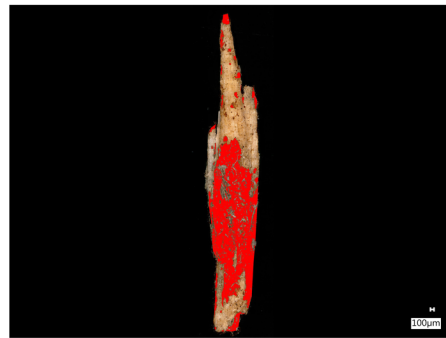

1-1.6\_Particle04.jpg

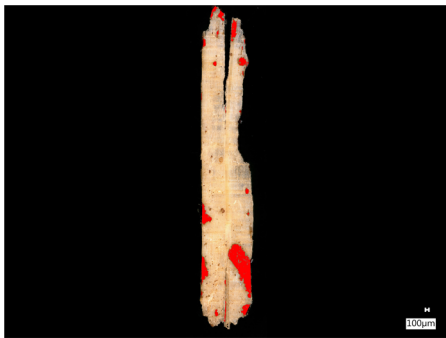

1-1.6\_Particle05.jpg

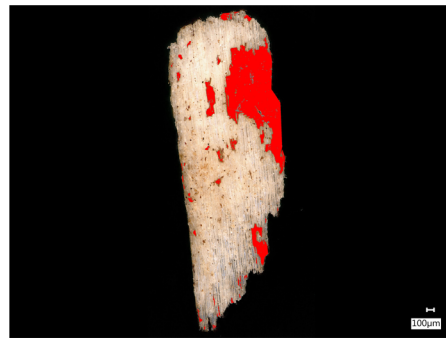

1-1.6\_Particle06.jpg

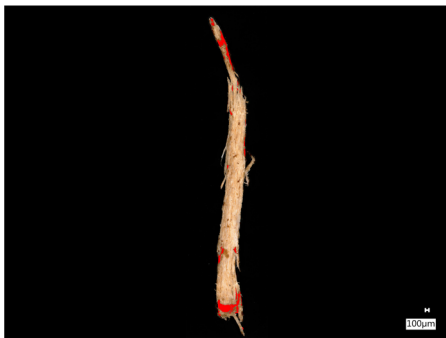

1-1.6\_Particle07.jpg

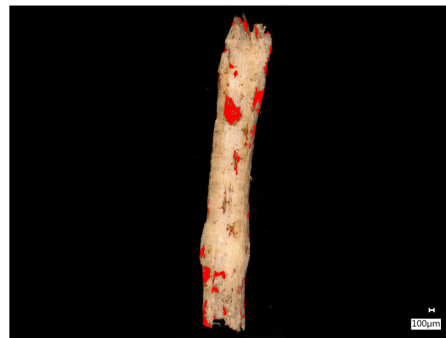

1-1.6\_Particle08.jpg

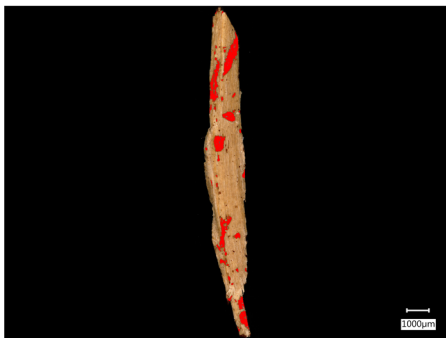

1-1.6\_Particle09.jpg

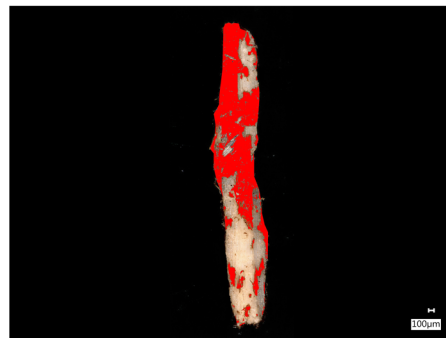

1-1.6\_Particle10.jpg



Particle Material 2 (AC 8%)

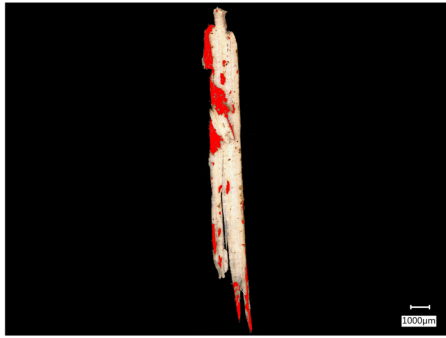

1.6-2\_Particle01.jpg

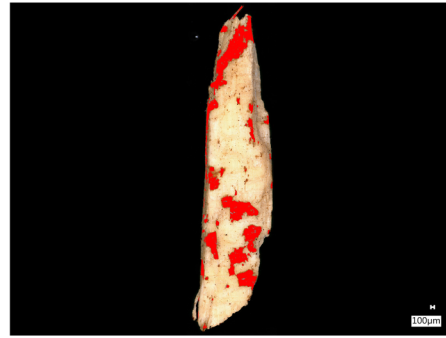

1.6-2\_Particle02.jpg

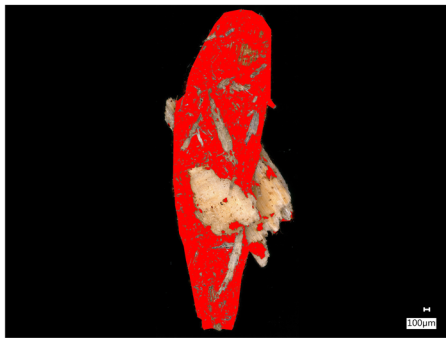

1.6-2\_Particle03.jpg

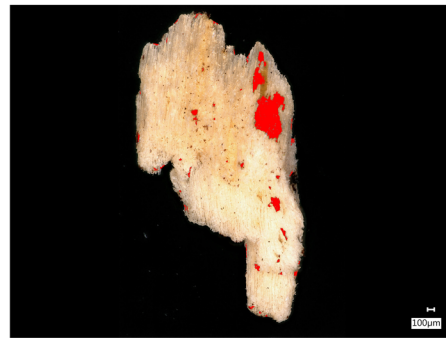

1.6-2\_Particle04.jpg

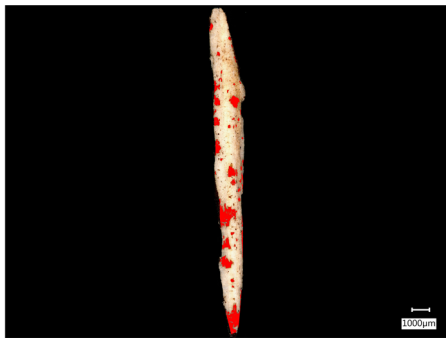

1.6-2\_Particle05.jpg

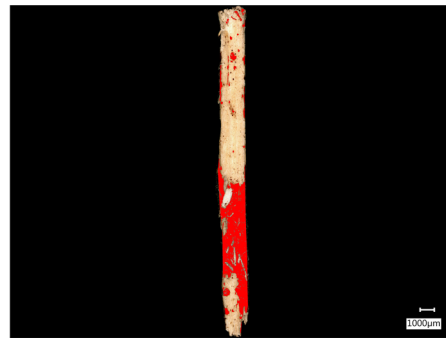

1.6-2\_Particle06.jpg

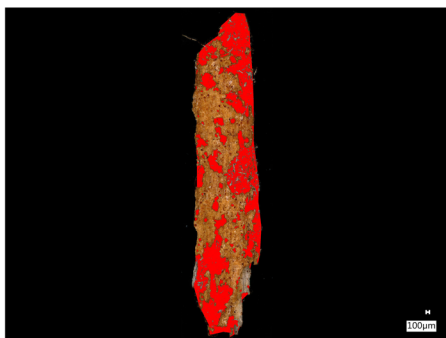

1.6-2\_Particle07.jpg

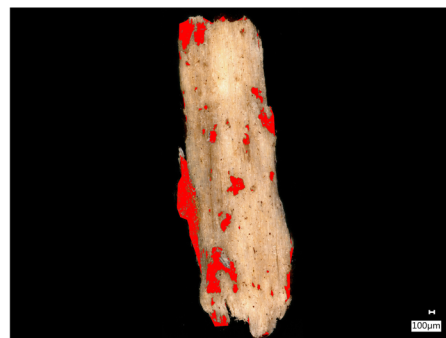

1.6-2\_Particle08.jpg

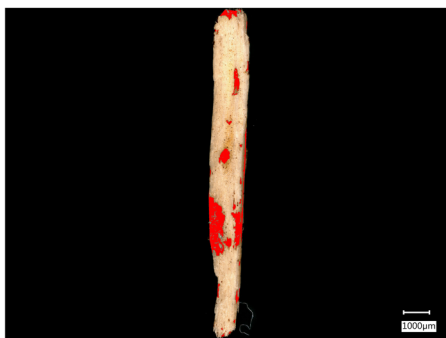

1.6-2\_Particle09.jpg

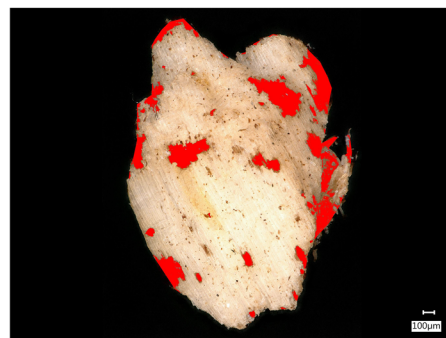

1.6-2\_Particle10.jpg

Particle Material 2 (AC 8%)

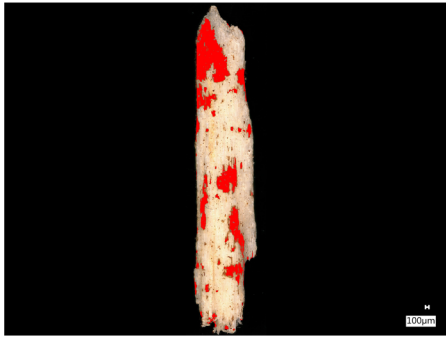

2-3.15\_Particle01.jpg

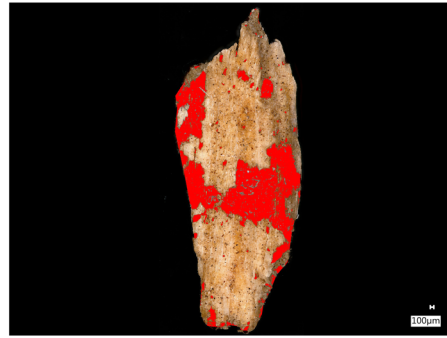

2-3.15\_Particle02.jpg

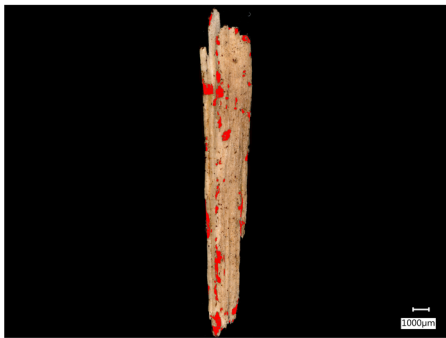

2-3.15\_Particle03.jpg

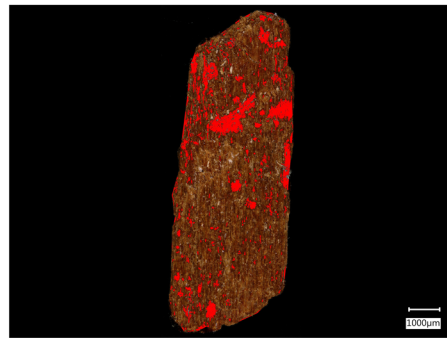

2-3.15\_Particle04.jpg

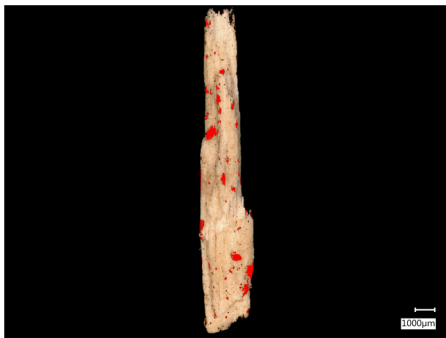

2-3.15\_Particle05.jpg

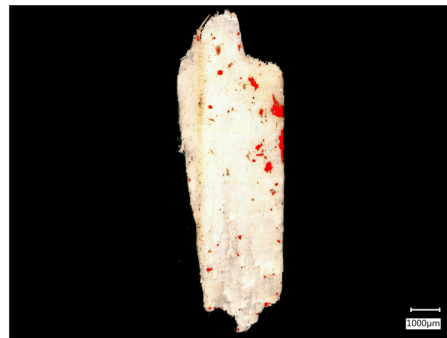

2-3.15\_Particle06.jpg

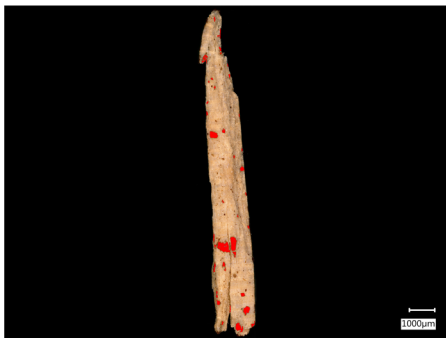

2-3.15\_Particle07.jpg

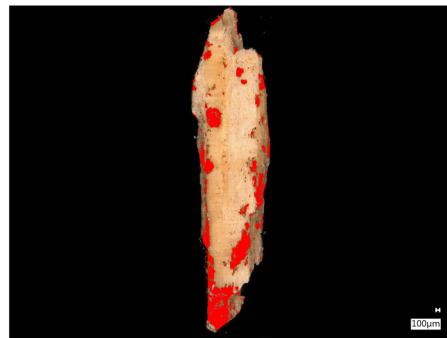

2-3.15\_Particle08.jpg

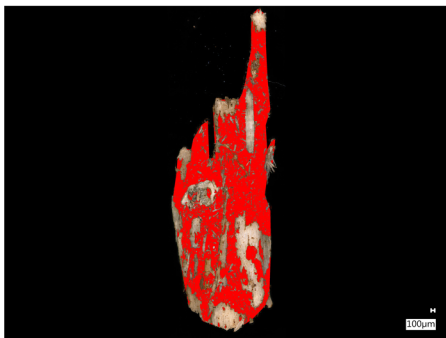

2-3.15\_Particle09.jpg

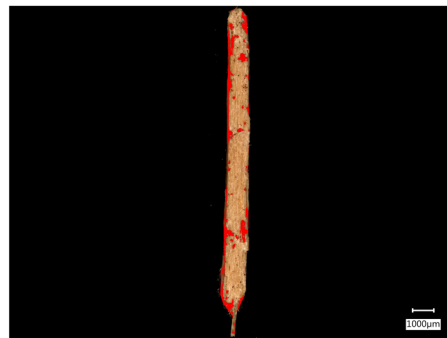

2-3.15\_Particle10.jpg

Particle Material 2 (AC 8%)

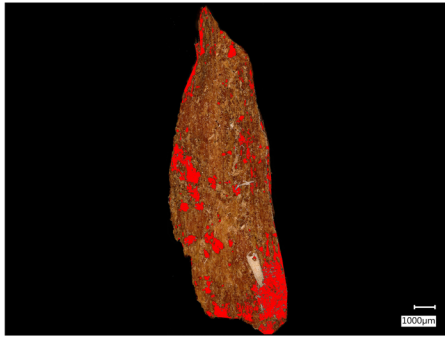

3.15-4\_Particle01.jpg

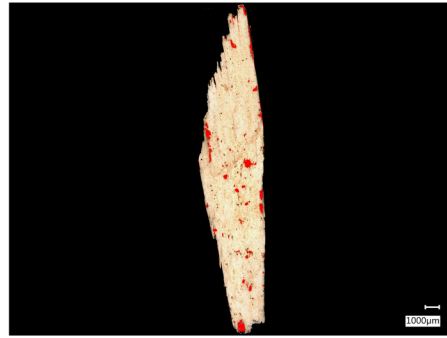

3.15-4\_Particle02.jpg

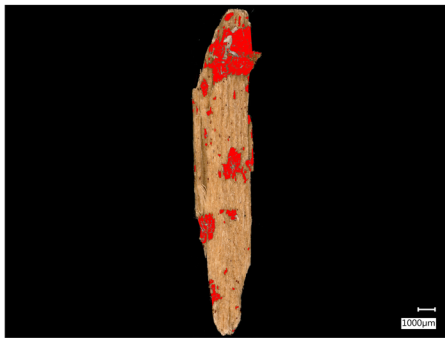

3.15-4\_Particle03.jpg

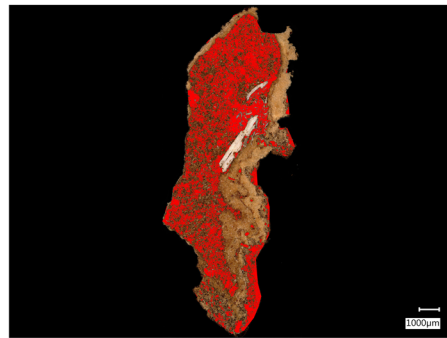

3.15-4\_Particle04.jpg

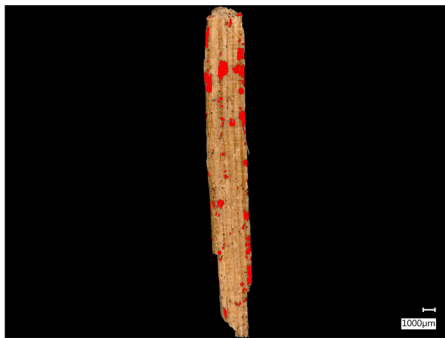

3.15-4\_Particle05.jpg

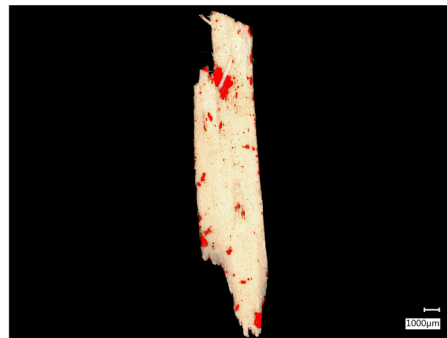

3.15-4\_Particle06.jpg

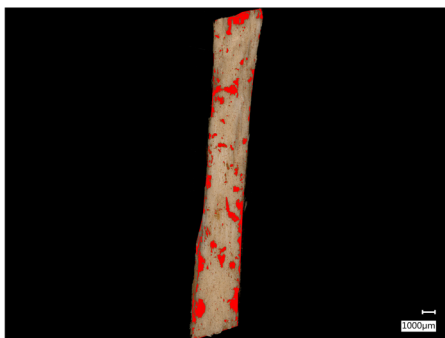

3.15-4\_Particle07.jpg

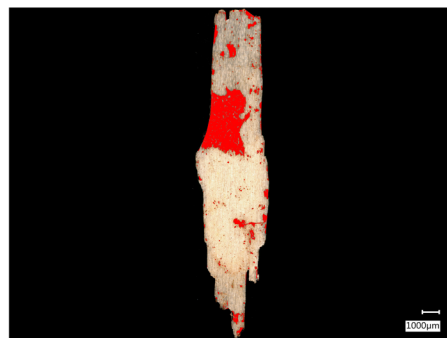

3.15-4\_Particle08.jpg

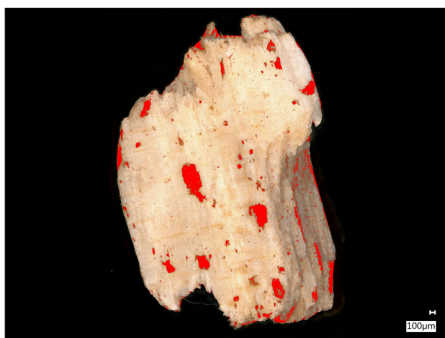

3.15-4\_Particle09.jpg

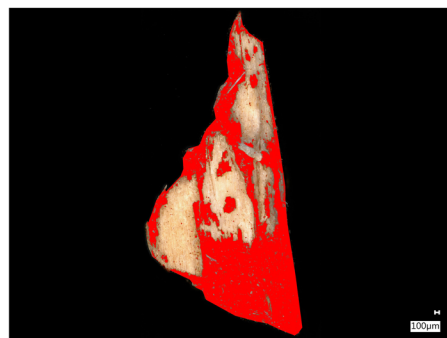

3.15-4\_Particle10.jpg

Particle Material 2 (AC 8%)

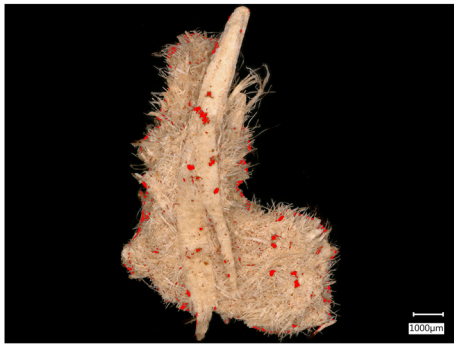

4-5\_Particle01.jpg

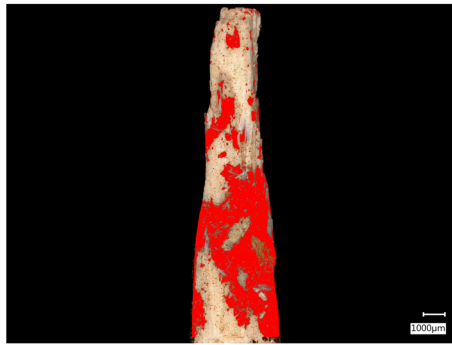

4-5\_Particle02a.jpg

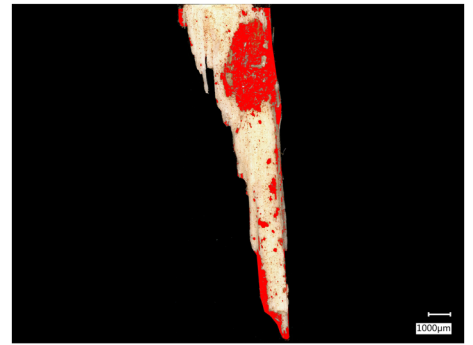

4-5\_Particle02b.jpg

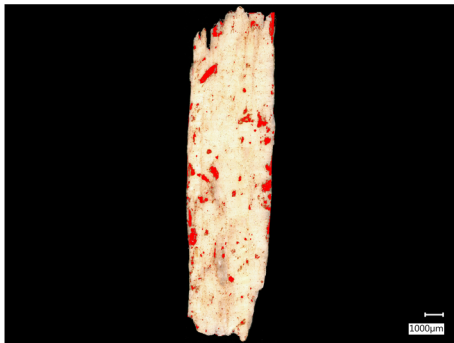

4-5\_Particle03.jpg

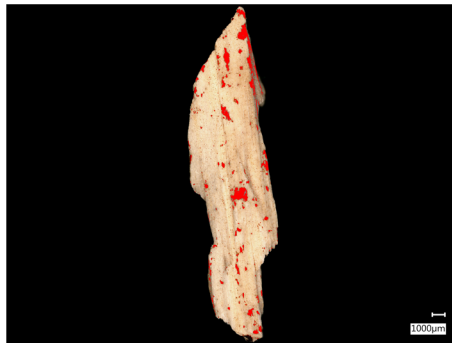

4-5\_Particle04.jpg

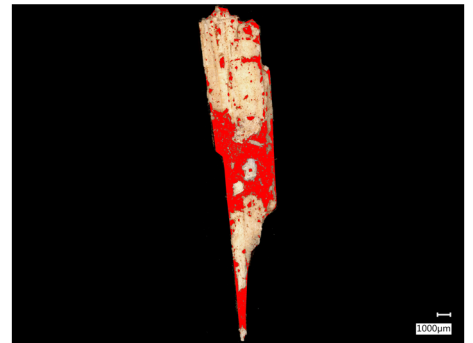

4-5\_Particle05.jpg

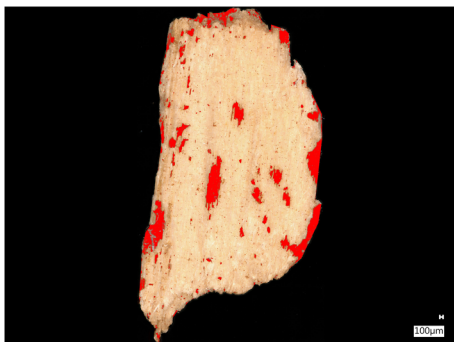

4-5\_Particle06.jpg

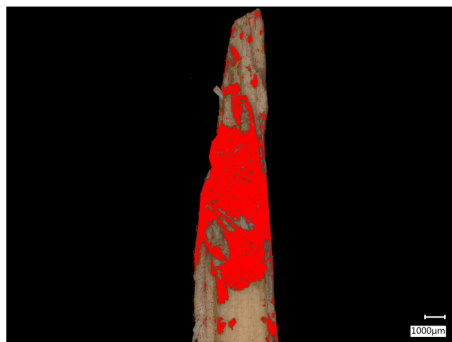

4-5\_Particle07a.jpg

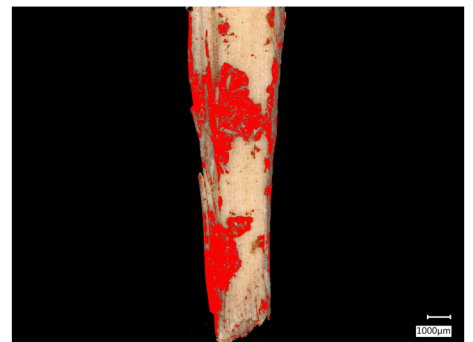

4-5\_Particle07b.jpg

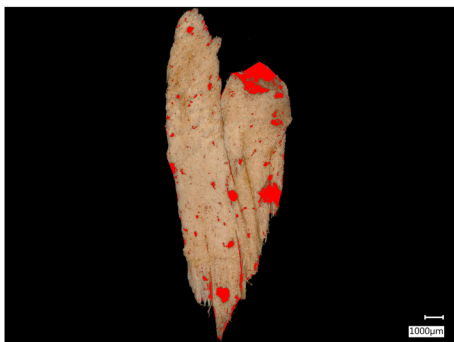

4-5\_Particle08.jpg

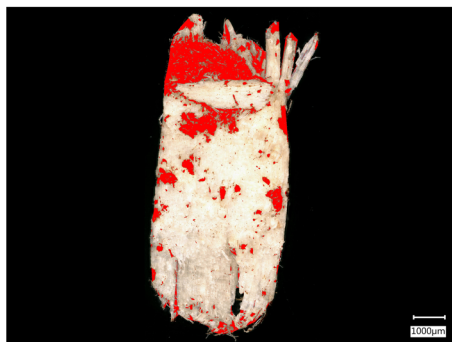

4-5\_Particle09.jpg

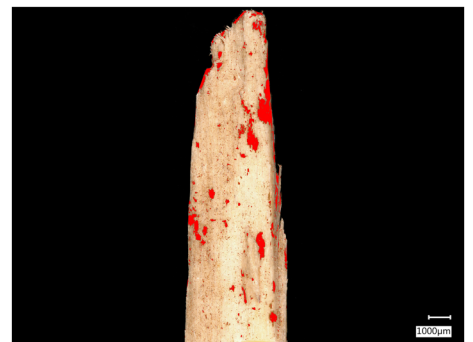

4-5\_Particle10a.jpg

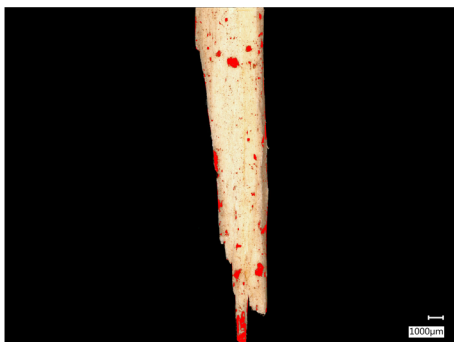

4-5\_Particle10b.jpg

## Particle Material 2 (AC 8%)

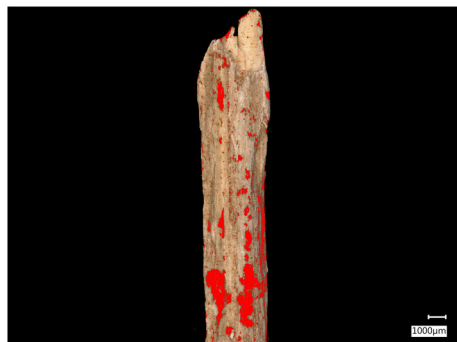

5-8\_Particle01a.jpg

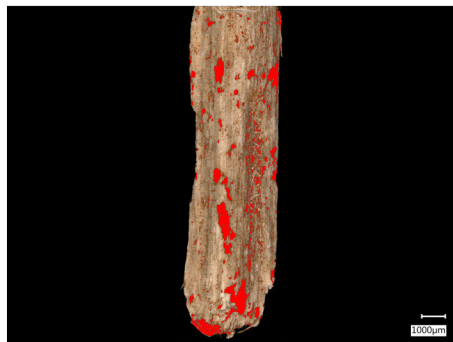

5-8\_Particle01b.jpg

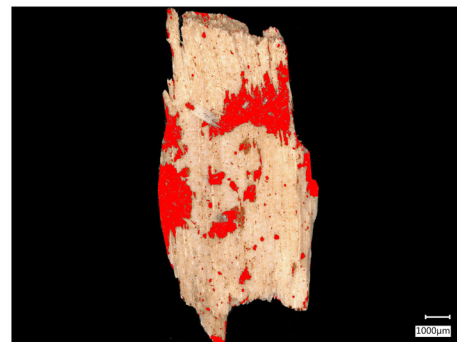

5-8\_Particle02.jpg

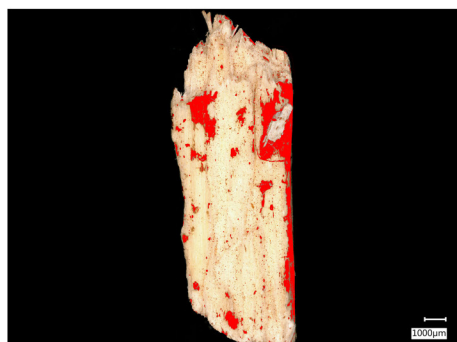

5-8\_Particle03.jpg

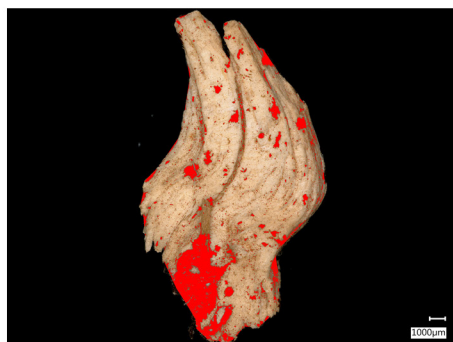

5-8\_Particle04.jpg

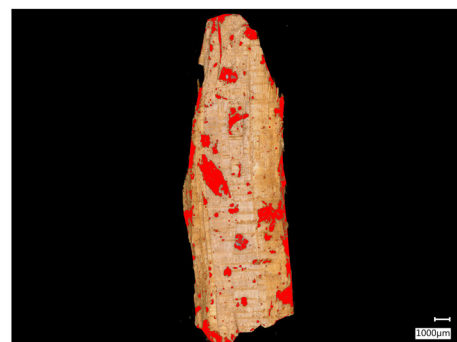

5-8\_Particle05.jpg

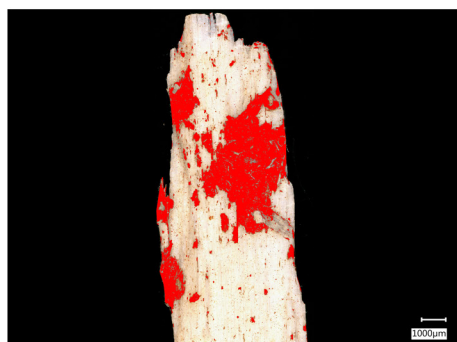

5-8\_Particle06a.jpg

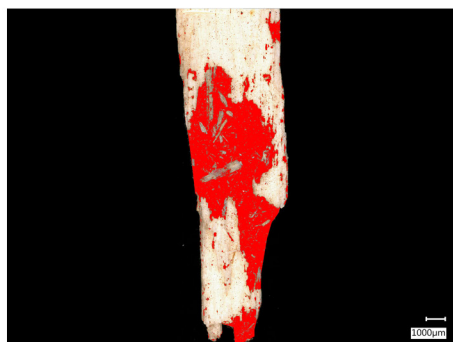

5-8\_Particle06b.jpg

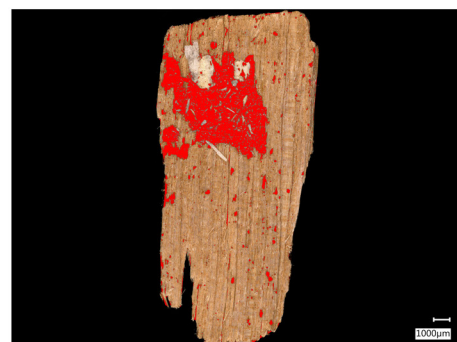

5-8\_Particle07.jpg

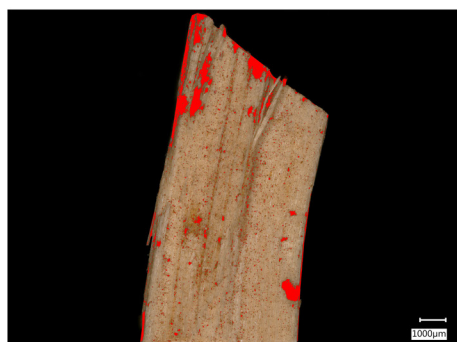

5-8\_Particle08a.jpg

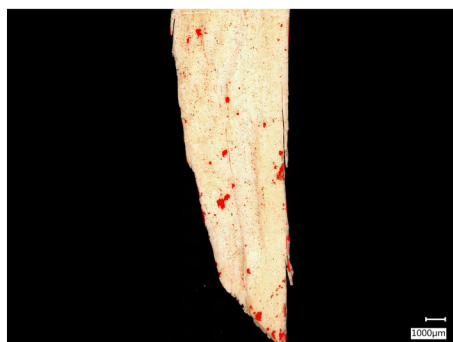

5-8\_Particle08b.jpg

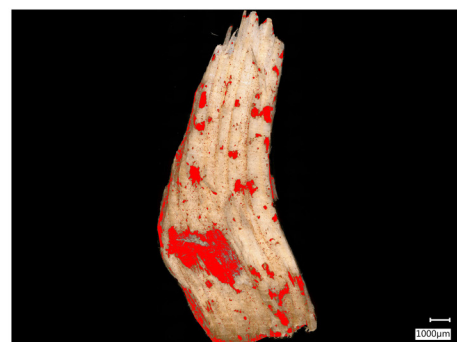

5-8\_Particle09.jpg

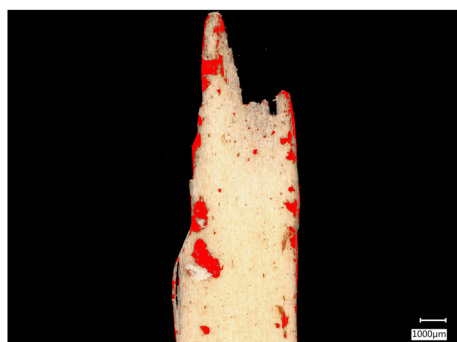

5-8\_Particle10a.jpg

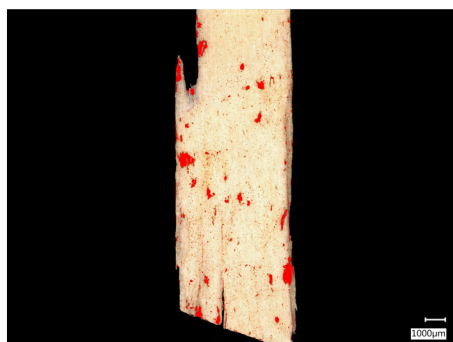

5-8\_Particle10b.jpg



Particle Material 2 (AC 8%)

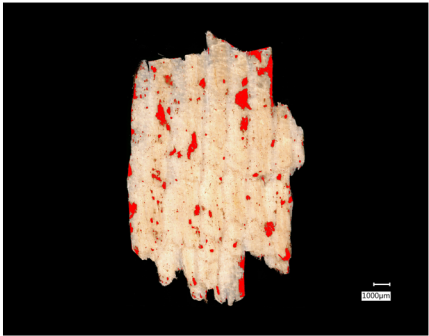

8\_Particle01.jpg

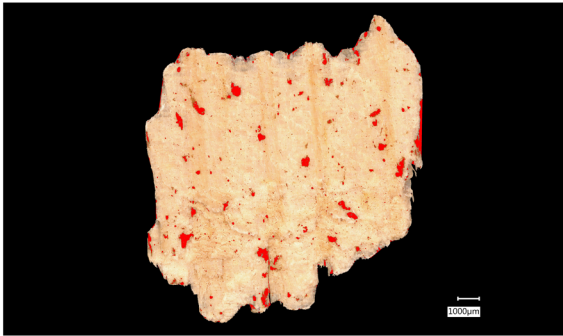

8\_Particle02.jpg

Particle Material 3 (AC 19%)

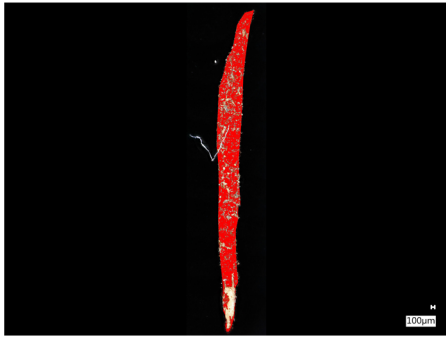

0-0.8\_Particle01.jpg

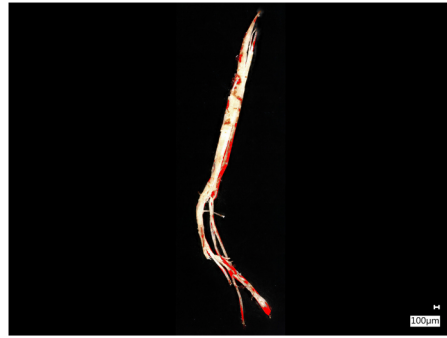

0-0.8\_Particle02.jpg

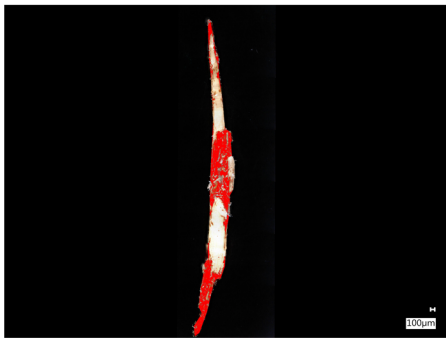

0-0.8\_Particle03.jpg

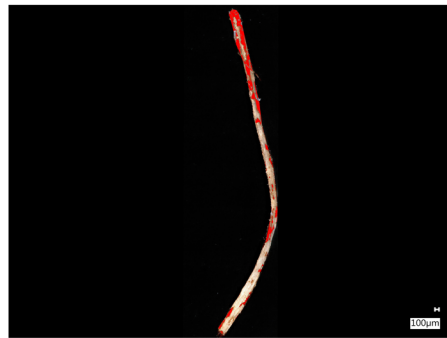

0-0.8\_Particle04.jpg

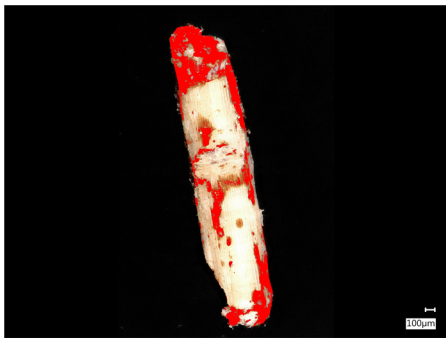

0-0.8\_Particle05.jpg

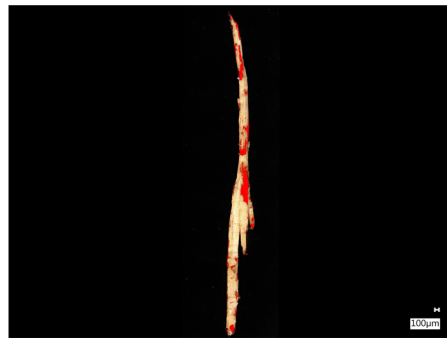

0-0.8\_Particle06.jpg

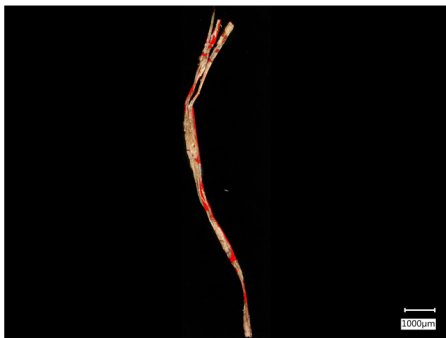

0-0.8\_Particle07.jpg

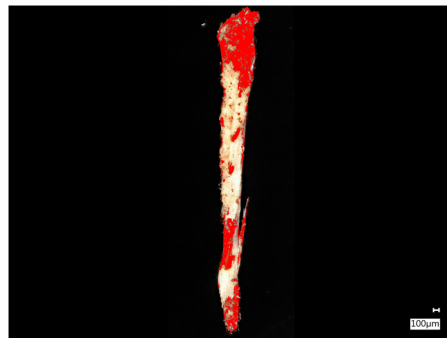

0-0.8\_Particle08.jpg

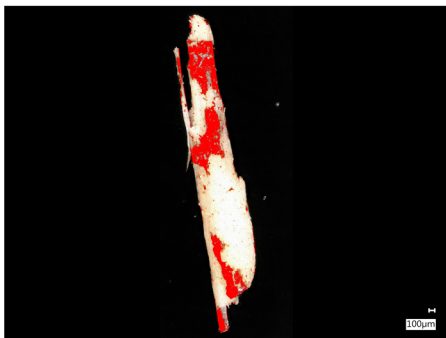

0-0.8\_Particle09.jpg

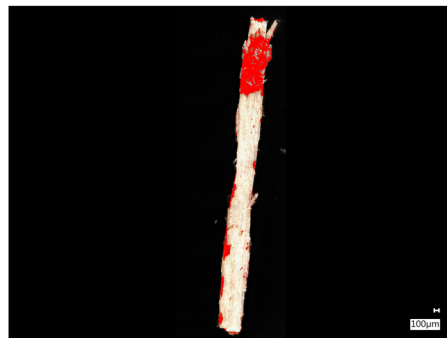

0-0.8\_Particle10.jpg

Particle Material 3 (AC 19%)

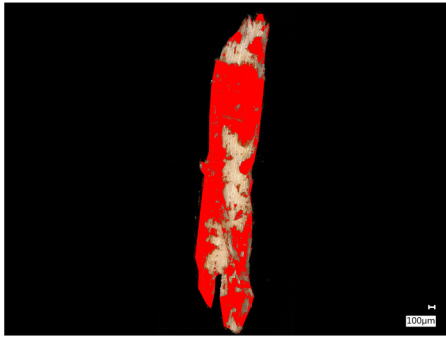

0.8-1\_Particle01.jpg

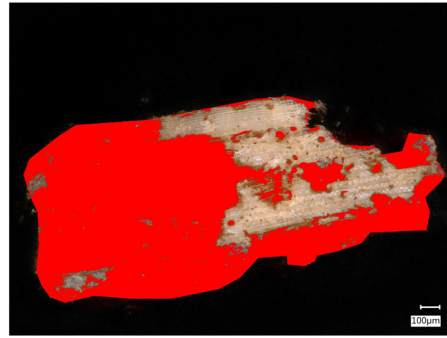

0.8-1\_Particle02.jpg

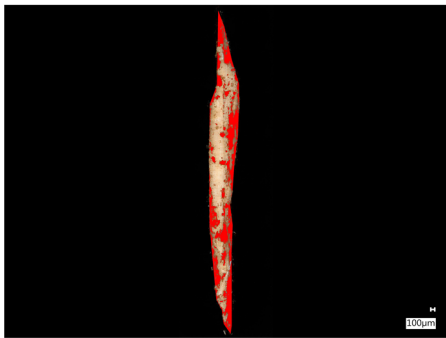

0.8-1\_Particle03.jpg

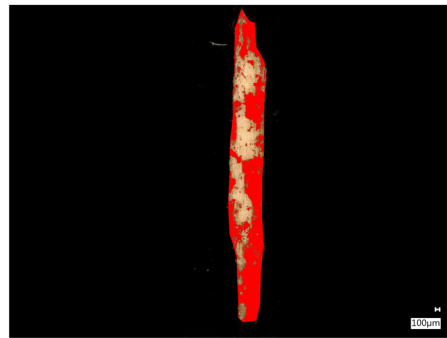

0.8-1\_Particle04.jpg

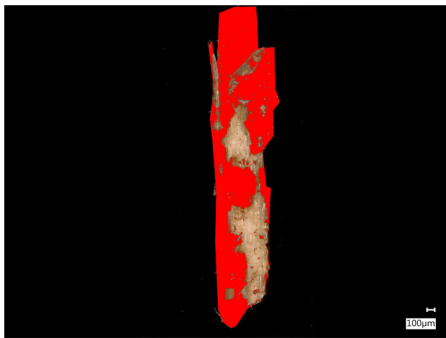

0.8-1\_Particle05.jpg

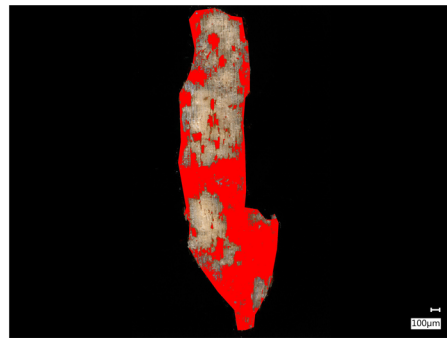

0.8-1\_Particle06.jpg

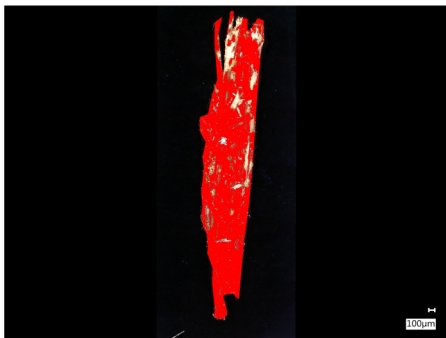

0.8-1\_Particle07.jpg

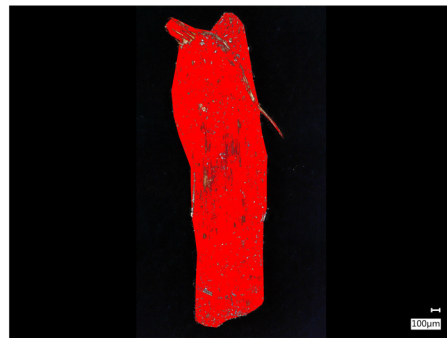

0.8-1\_Particle08.jpg

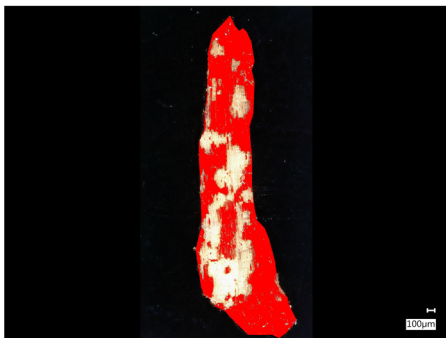

0.8-1\_Particle09.jpg

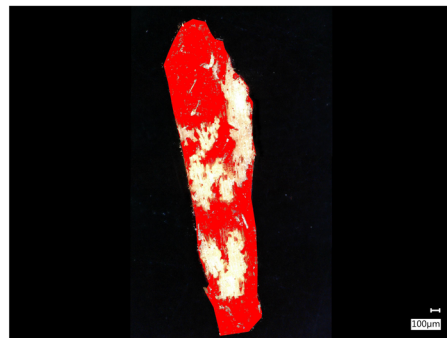

0.8-1\_Particle10.jpg



Particle Material 3 (AC 19%)

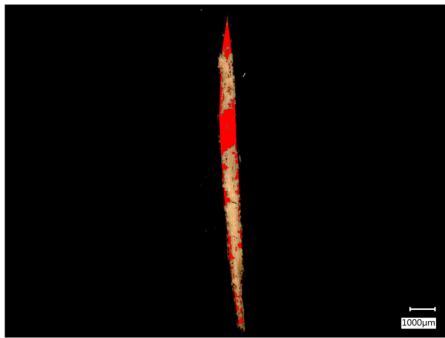

1-1.6\_Particle01.jpg

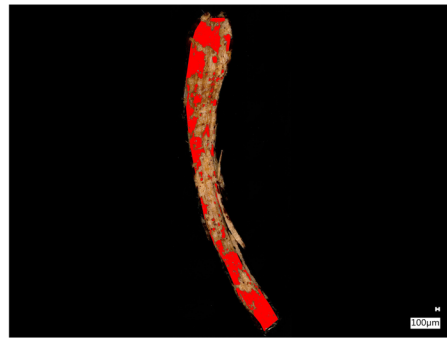

1-1.6\_Particle02.jpg

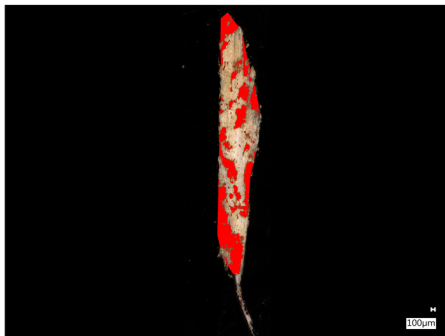

1-1.6\_Particle03.jpg

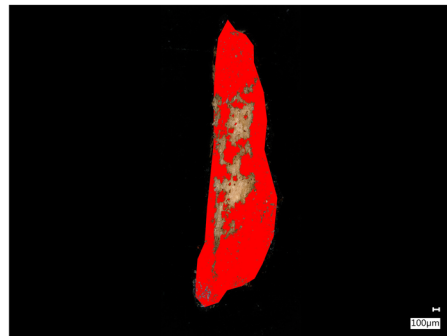

1-1.6\_Particle04.jpg

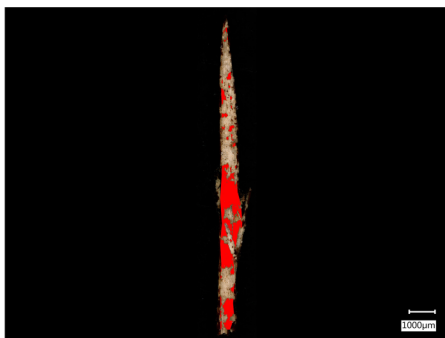

1-1.6\_Particle05.jpg

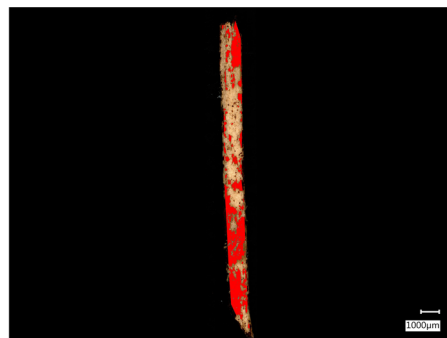

1-1.6\_Particle06.jpg

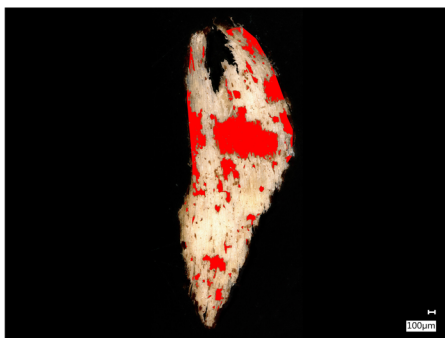

1-1.6\_Particle07.jpg

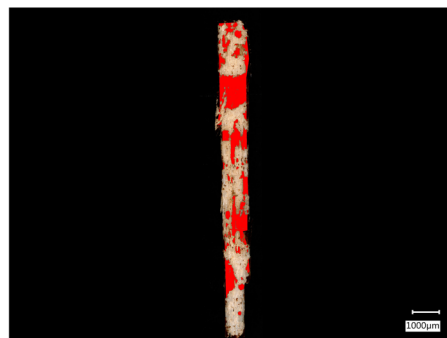

1-1.6\_Particle08.jpg

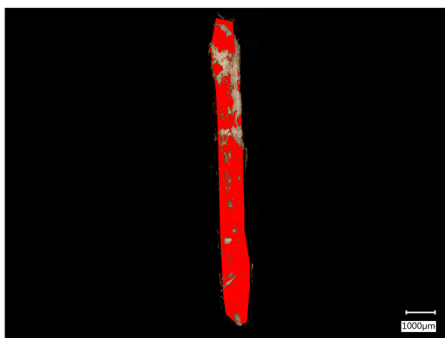

1-1.6\_Particle09.jpg

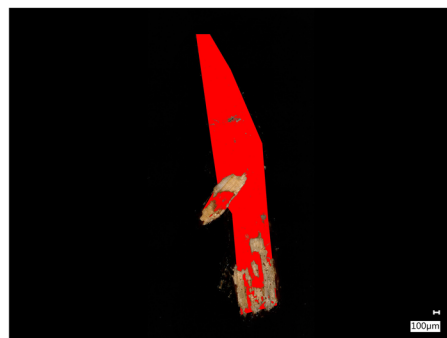

1-1.6\_Particle10.jpg

Particle Material 3 (AC 19%)

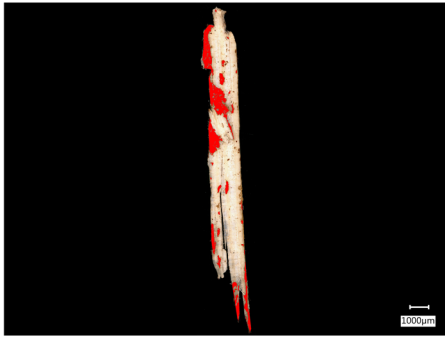

1.6-2\_Particle01.jpg

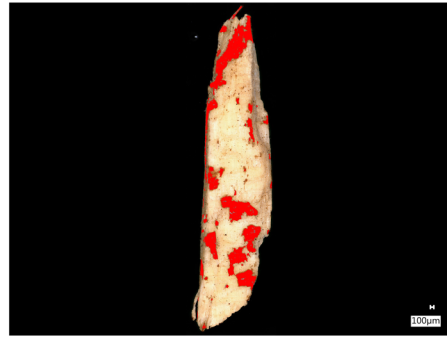

1.6-2\_Particle02.jpg

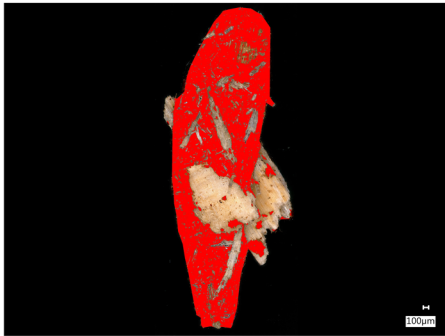

1.6-2\_Particle03.jpg

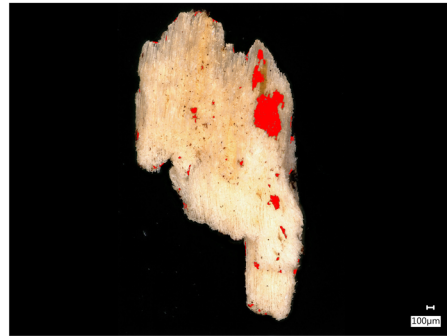

1.6-2\_Particle04.jpg

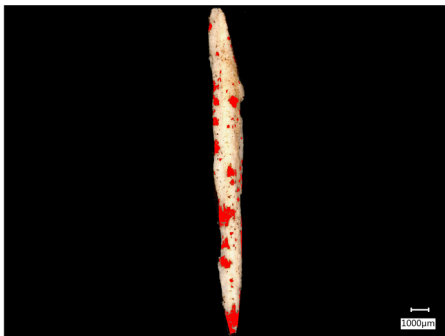

1.6-2\_Particle05.jpg

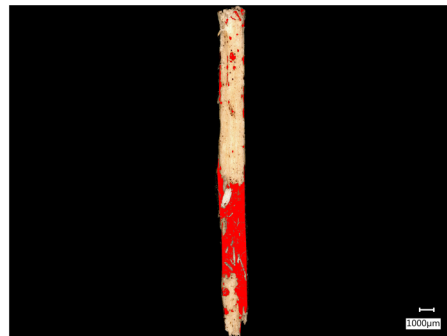

1.6-2\_Particle06.jpg

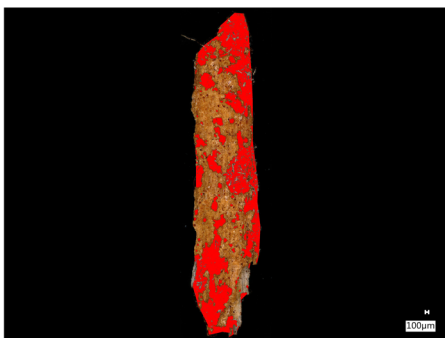

1.6-2\_Particle07.jpg

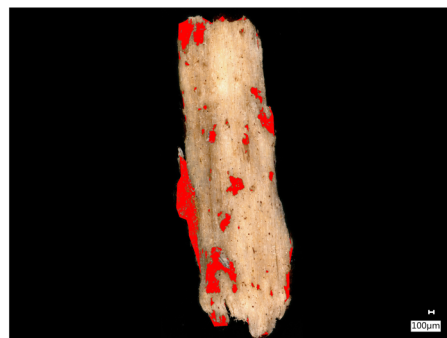

1.6-2\_Particle08.jpg

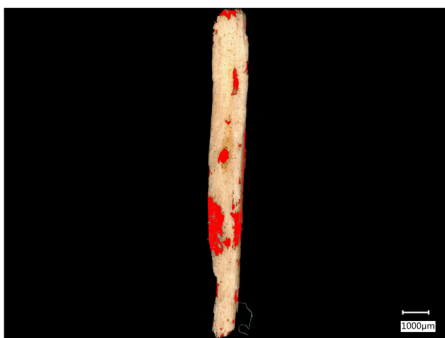

1.6-2\_Particle09.jpg

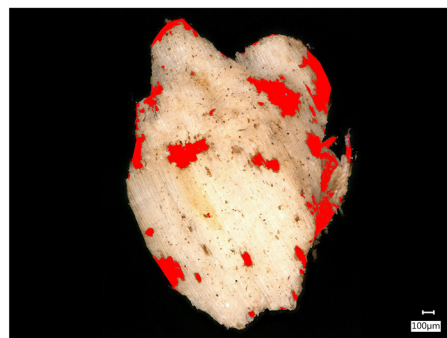

1.6-2\_Particle10.jpg

Particle Material 3 (AC 19%)

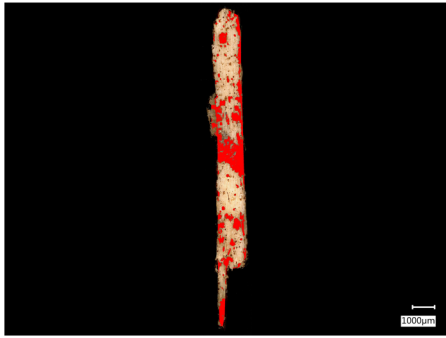

2-3.15\_Particle01.jpg

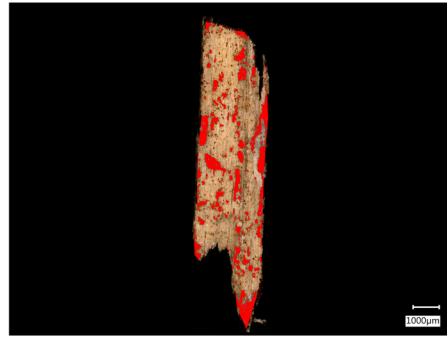

2-3.15\_Particle02.jpg

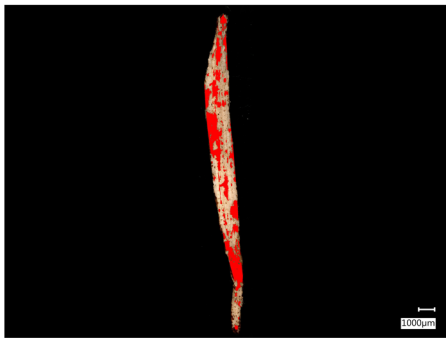

2-3.15\_Particle03.jpg

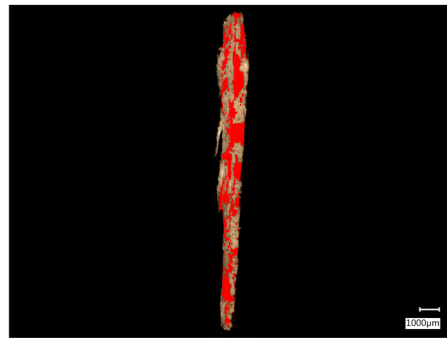

2-3.15\_Particle04.jpg

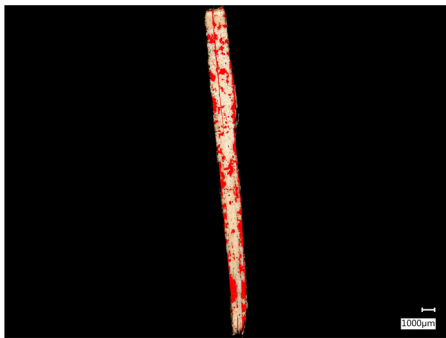

2-3.15\_Particle05.jpg

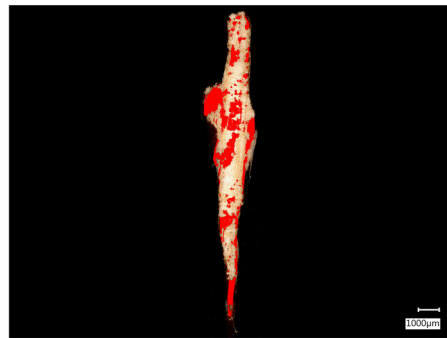

2-3.15\_Particle06.jpg

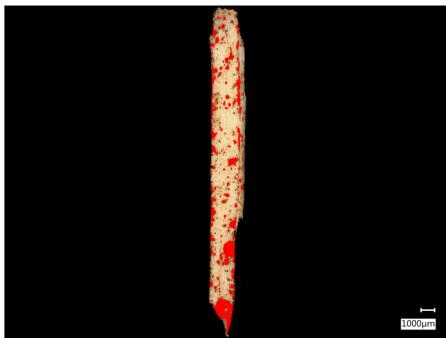

2-3.15\_Particle07.jpg

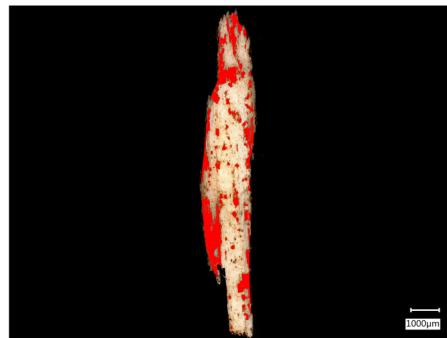

2-3.15\_Particle08.jpg

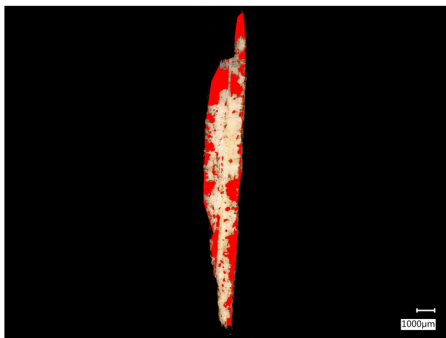

2-3.15\_Particle09.jpg

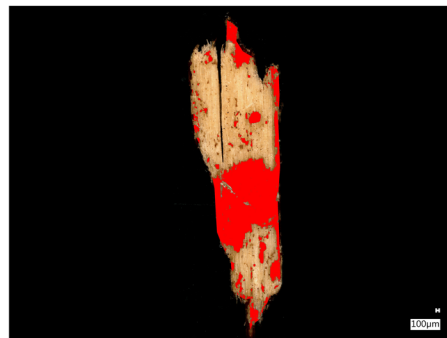

2-3.15\_Particle10.jpg

Particle Material 3 (AC 19%)

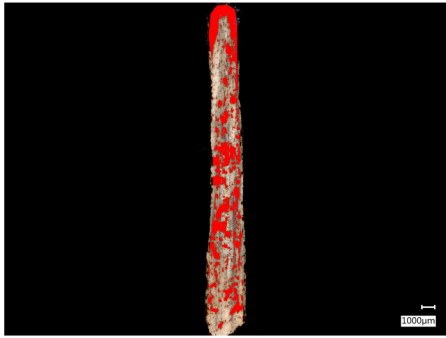

3.15-4\_Particle01.jpg

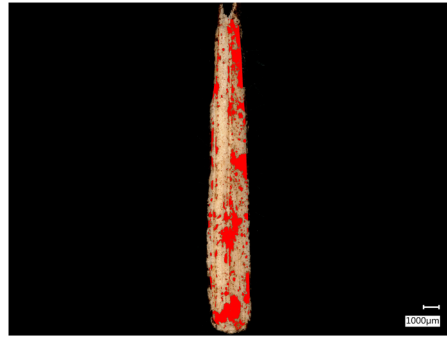

3.15-4\_Particle02.jpg

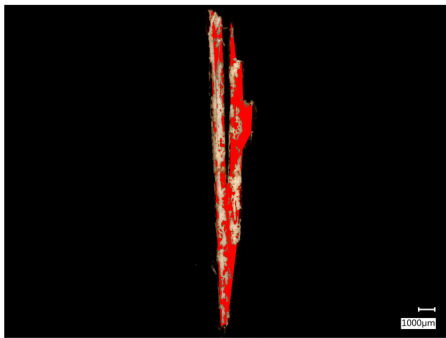

3.15-4\_Particle03.jpg

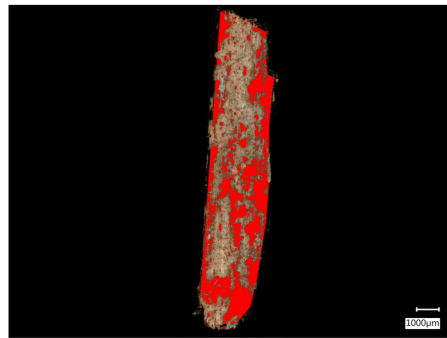

3.15-4\_Particle04.jpg

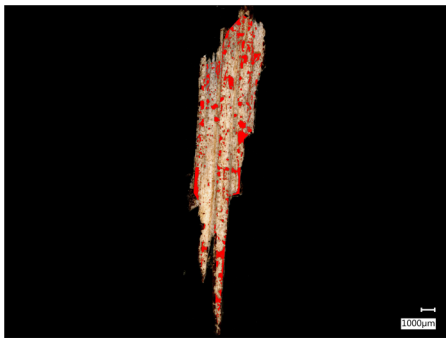

3.15-4\_Particle05.jpg

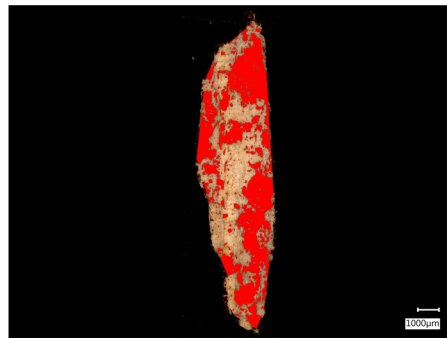

3.15-4\_Particle06.jpg

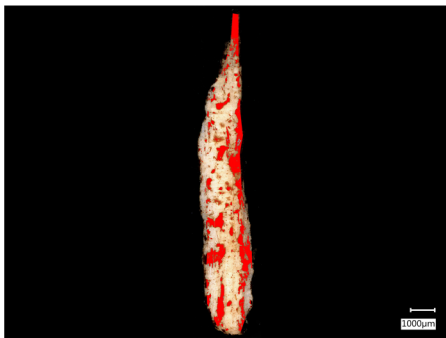

3.15-4\_Particle07.jpg

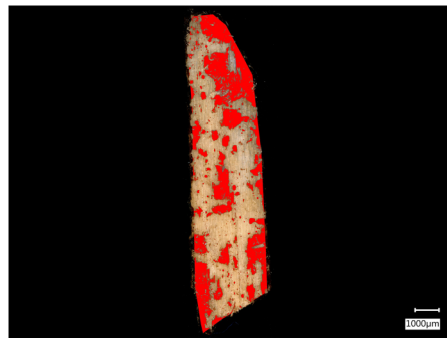

3.15-4\_Particle08.jpg

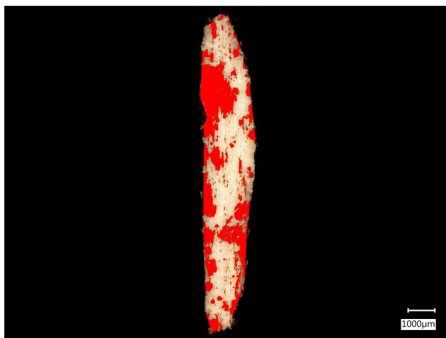

3.15-4\_Particle09.jpg

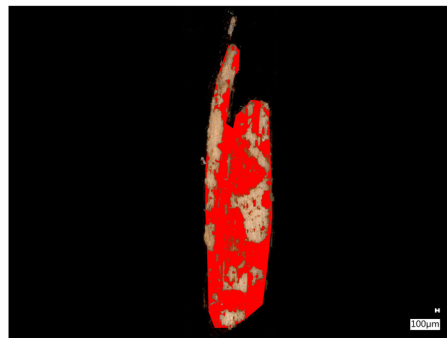

3.15-4\_Particle10.jpg

Particle Material 3 (AC 19%)

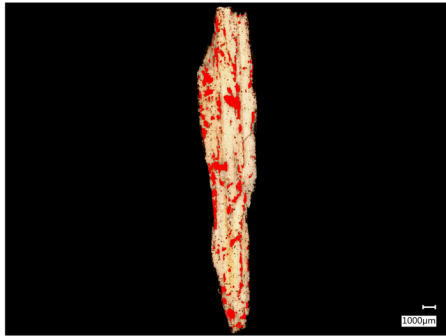

4-5\_Particle01.jpg

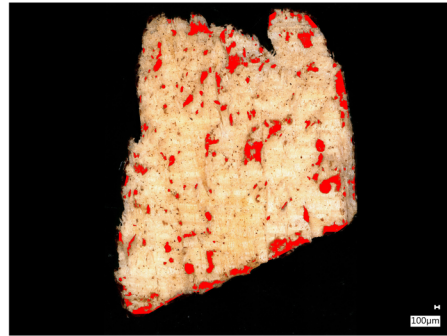

4-5\_Particle02.jpg

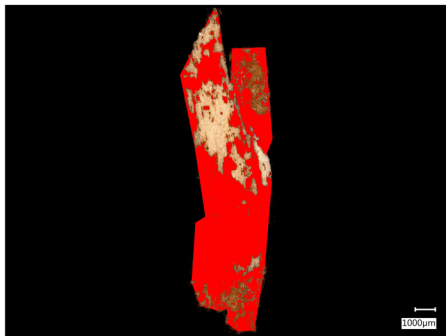

4-5\_Particle03.jpg

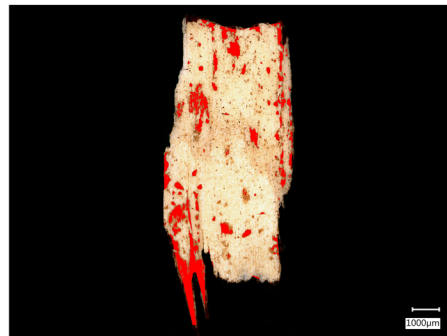

4-5\_Particle04.jpg

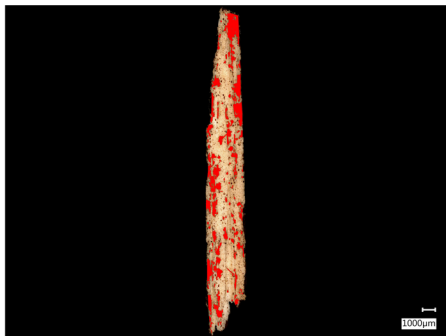

4-5\_Particle05.jpg

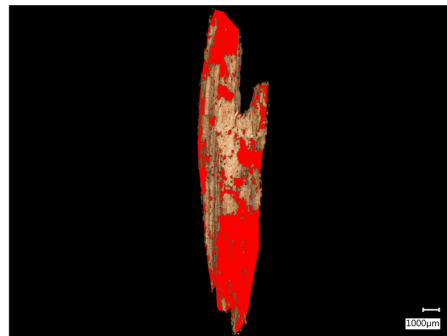

4-5\_Particle06.jpg

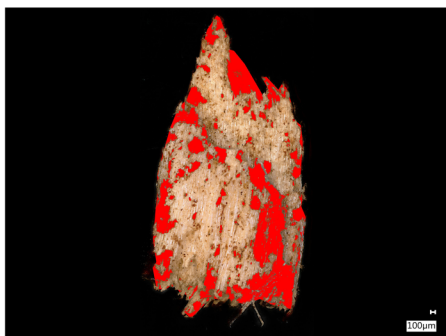

4-5\_Particle07.jpg

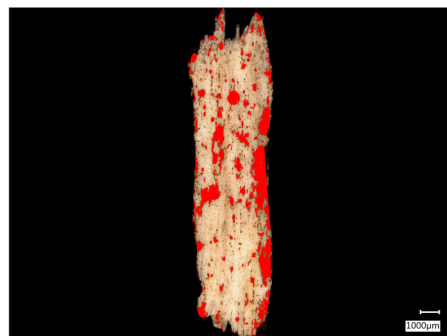

4-5\_Particle08.jpg

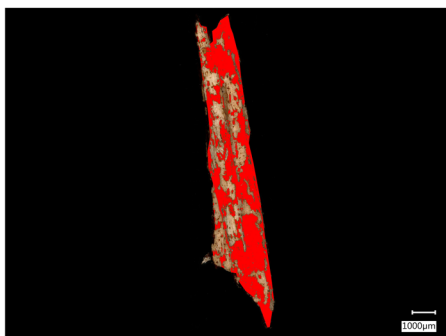

4-5\_Particle09.jpg

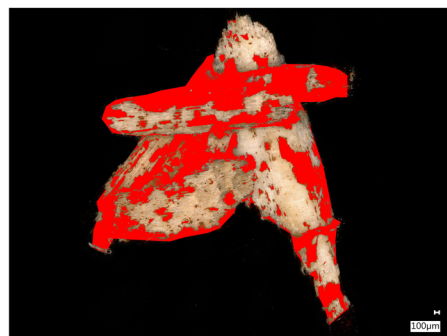

4-5\_Particle10.jpg

Particle Material 3 (AC 19%)

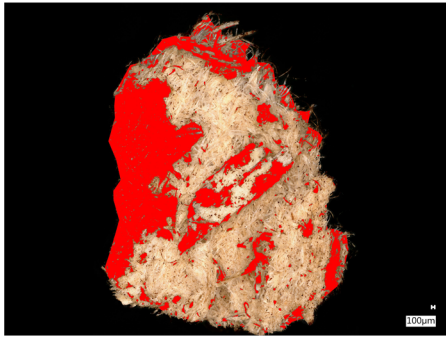

5-8\_Particle01.jpg

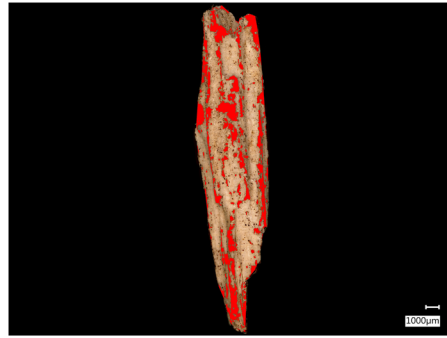

5-8\_Particle02.jpg

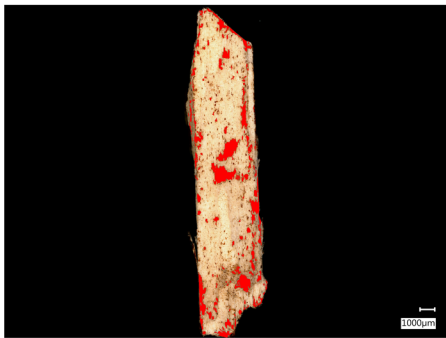

5-8\_Particle03.jpg

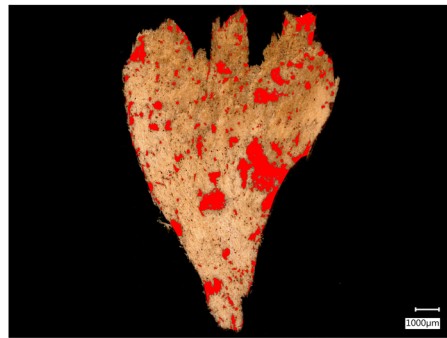

5-8\_Particle04.jpg

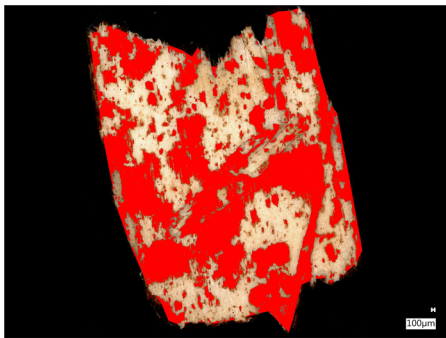

5-8\_Particle05.jpg

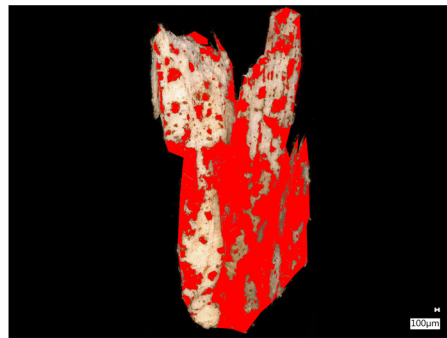

5-8\_Particle06.jpg

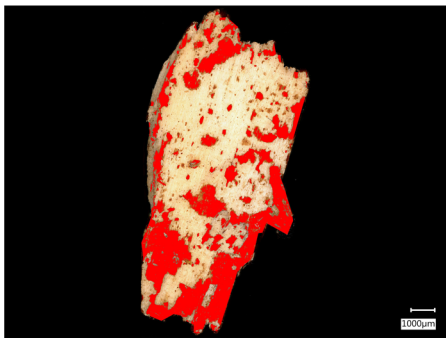

5-8\_Particle07.jpg

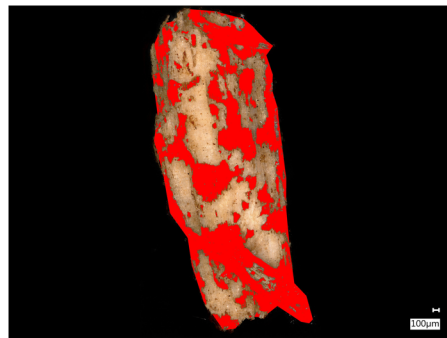

5-8\_Particle08.jpg

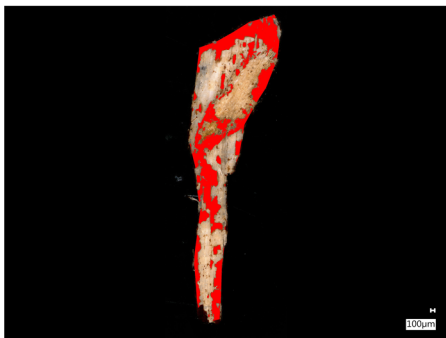

5-8\_Particle09.jpg

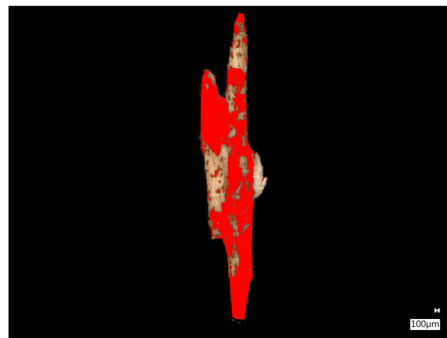

5-8\_Particle10.jpg

# Particle Material 3 (AC 19%)

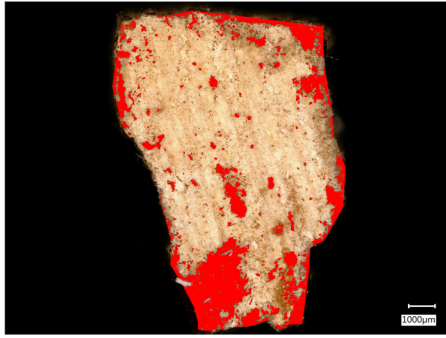

8\_Particle01.jpg
